# Supplementary material for: Impact of HBV infection on clinical outcomes in patients with metabolic dysfunction-associated fatty liver disease
Source: PubMed Central journal article supplement — JHEP Rep. 2023 Jun 29;5(9):100836. doi: 10.1016/j.jhepr.2023.100836 (PMC10432217; doi:10.1016/j.jhepr.2023.100836), 2023-06-29
Supplement: mmc1.pdf [file mmc1.pdf]

# **Impact of HBV infection on clinical outcomes in patients with metabolic dysfunction-associated fatty liver disease**

Yu-Ming Cheng, Tsung-Han Hsieh, Chia-Chi Wang, Jia-Horng Kao

## Table of contents

|               |   |
|---------------|---|
| Table S1..... | 2 |
| Table S2..... | 3 |
| Table S3..... | 4 |
| Table S4..... | 5 |

Table S1: Clinical characteristics and outcomes between the “HBV alone” group and the “healthy controls” in participants without MAFLD. Level of significance:  $p < 0.05$  (chi-square and student’s t tests)

|                        | Healthy controls<br>N= 11116 | HBV alone<br>N= 1415 | P-value |
|------------------------|------------------------------|----------------------|---------|
| Age, year              | 55.21 ±10.62                 | 54.19 ±9.78          | 0.0003  |
| Male, n (%)            | 2969 (26.71)                 | 481 (33.99)          | <.0001  |
| Diabetes, n (%)        | 537 (4.83)                   | 59 (4.17)            | 0.2710  |
| Hypertension, n (%)    | 1440 (12.95)                 | 159 (11.24)          | 0.0682  |
| Dyslipidemia, n (%)    | 1069 (9.62)                  | 97 (6.86)            | 0.0008  |
| BMI, kg/m <sup>2</sup> | 22.83 ±3.05                  | 22.98 ±3.05          | 0.0743  |
| Glucose, mg/dL         | 93.80 ±16.07                 | 93.22 ±16.85         | 0.2176  |
| HbA1c, %               | 5.73 ±0.64                   | 5.68 ±0.61           | 0.0019  |
| TG, mg/dL              | 94.90 ±54.41                 | 90.92 ±49.90         | 0.0052  |
| CHO, mg/dL             | 197.71 ±36.30                | 193.33 ±34.83        | <.0001  |
| HDL, mg/dL             | 59.16 ±13.73                 | 58.22 ±13.97         | 0.0157  |
| LDL, mg/dL             | 119.99 ±31.47                | 116.72 ±29.95        | 0.0001  |
| Uric acid, mg/dL       | 5.01 ±1.25                   | 5.05 ±1.26           | 0.2930  |
| AST, U/L               | 23.67 ±9.07                  | 28.05 ±17.29         | <.0001  |
| ALT, U/L               | 18.72 ±15.30                 | 26.73 ±31.27         | <.0001  |
| GGT, U/L               | 19.06 ±20.66                 | 18.42 ±25.93         | 0.3688  |
| Fatty liver index      | 15.57 ±16.04                 | 15.35 ±15.78         | 0.6329  |
| FIB-4                  | 1.46 ±0.73                   | 1.60 ±0.88           | <.0001  |
| NFS                    | -1.88 ±1.20                  | -1.84 ±1.17          | 0.2835  |
| Creatinine, mg/dL      | 0.71 ±0.33                   | 0.74 ±0.61           | 0.0643  |
| eGFR, ml/min/1.732     | 107.27 ±25.08                | 107.10 ±24.84        | 0.8096  |
| IMT, mm                | 0.59 ±0.14                   | 0.58 ±0.13           | 0.0209  |
| Carotid plaque, n (%)  | 3088 (27.78)                 | 364 (25.72)          | 0.1031  |

Abbreviation: DM, diabetes mellitus; HTN, hypertension; BMI, body mass index; HbA1c, glycated hemoglobin; TG, triglycerides; CHO, cholesterol; HDL, high-density lipoprotein; LDL, low-density lipoprotein; AST, aspartate aminotransferase; ALT, alanine aminotransferase; GGT,  $\gamma$ -glutamyl transferase; FIB-4, fibrosis-4; NFS, NAFLD fibrosis score; eGFR, estimated glomerular filtration rate; IMT, intima media thickness.

Table S2: Factors associated with biomarkers of advanced liver fibrosis in the participants without MAFLD (n=12531). Level of significance:  $p < 0.05$  (binary logistic regression)

| FIB-4 > 2.67 | AOR   | (95% CI)       | <i>P value</i> |
|--------------|-------|----------------|----------------|
| Age, year    | 1.175 | (1.158- 1.192) | <.0001         |
| Male         | 1.143 | (0.949- 1.377) | 0.1593         |
| HBV          | 2.215 | (1.744- 2.813) | <.0001         |
| GGT, U/L     | 1.008 | (1.005- 1.011) | <.0001         |
| FLI          | 0.986 | (0.979- 0.992) | <.0001         |

Abbreviation: MAFLD, metabolic associated fatty liver disease; FIB-4, fibrosis-4; AOR, adjusted odds ratio; CI, confidence interval; GGT,  $\gamma$ -glutamyl transferase; FLI, fatty liver index; NFS, NAFLD fibrosis score.

Table S3: Factors associated with carotid plaques in the participants without MAFLD (n=12531). Level of significance:  $p < 0.05$  (binary logistic regression)

|              | AOR   | 95% CI        | P value |
|--------------|-------|---------------|---------|
| Age, year    | 1.109 | (1.103-1.116) | <.0001  |
| Male         | 1.711 | (1.555-1.882) | <.0001  |
| HBV          | 1.003 | (0.871-1.155) | 0.9674  |
| DM           | 1.521 | (1.262-1.835) | <.0001  |
| HTN          | 1.783 | (1.579-2.015) | <.0001  |
| Dyslipidemia | 1.151 | (1.001-1.323) | 0.0480  |

Abbreviation: MAFLD, metabolic associated fatty liver disease; AOR, adjusted odds ratio; CI, confidence interval; HBV, hepatitis B virus; DM, diabetes mellitus; HTN, hypertension

Table S4: Comparison of clinical characteristics and outcomes between those with MAFLD and those without in the chronic HBV-infected patients using propensity score matching. Level of significance:  $p < 0.05$  (chi-square and student's t tests)

|                        | HBV alone<br>N= 684 | Dual etiology<br>N= 684 | P-value |
|------------------------|---------------------|-------------------------|---------|
| Age, year              | 53.88 ±9.65         | 53.87 ±9.69             | 0.9933  |
| Male, n (%)            | 319 (46.64)         | 319 (46.64)             | >0.999  |
| Diabetes, n (%)        | 33 (4.82)           | 75 (10.96)              | <.0001  |
| Hypertension, n (%)    | 78 (11.40)          | 138 (20.18)             | <.0001  |
| Dyslipidemia, n (%)    | 48 (7.02)           | 81 (11.84)              | 0.0023  |
| Alcohol, n (%)         | 27 (3.95)           | 30 (4.39)               | 0.6848  |
| BMI, kg/m <sup>2</sup> | 22.95 ±2.88         | 26.75 ±3.66             | <.0001  |
| Glucose, mg/dL         | 93.92 ±17.50        | 102.75 ±27.11           | <.0001  |
| HbA1c, %               | 5.68 ±0.57          | 6.13 ±1.09              | <.0001  |
| TG, mg/dL              | 94.53 ±53.19        | 143.94 ±102.90          | <.0001  |
| CHO, mg/dL             | 193.52 ±34.27       | 195.78 ±38.92           | 0.2549  |
| HDL, mg/dL             | 57.01 ±13.69        | 48.57 ±11.21            | <.0001  |
| LDL, mg/dL             | 118.10 ±29.78       | 123.58 ±33.63           | 0.0015  |
| Uric acid, mg/dL       | 5.20 ±1.30          | 5.90 ±1.33              | <.0001  |
| AST, U/L               | 28.01 ±14.86        | 29.04 ±13.89            | 0.1897  |
| ALT, U/L               | 27.30 ±28.86        | 34.43 ±26.99            | <.0001  |
| GGT, U/L               | 18.88 ±23.67        | 25.23 ±17.44            | <.0001  |
| Fatty liver index      | 15.89 ±15.81        | 40.88 ±23.90            | <.0001  |
| FIB-4                  | 1.57 ±0.76          | 1.35 ±0.68              | <.0001  |
| NFS                    | -1.86 ±1.11         | -1.73 ±1.21             | 0.0408  |
| Creatinine, mg/dL      | 0.77 ±0.74          | 0.77 ±0.53              | 0.9879  |
| eGFR, ml/min/1.732     | 105.46 ±21.88       | 104.64 ±23.72           | 0.5050  |
| IMT, mm                | 0.58 ±0.14          | 0.62 ±0.13              | <.0001  |
| Carotid plaque, n (%)  | 176 (25.73)         | 184 (26.90)             | 0.6233  |

Abbreviation: DM, diabetes mellitus; HTN, hypertension; BMI, body mass index; HbA1c, glycated hemoglobin; TG, triglycerides; CHO, cholesterol; HDL, high-density lipoprotein; LDL, low-density lipoprotein; AST, aspartate aminotransferase; ALT, alanine aminotransferase; GGT,  $\gamma$ -glutamyl transferase; FIB-4, fibrosis-4; NFS, NAFLD fibrosis score; eGFR, estimated

---

glomerular filtration rate; IMT, intima media thickness.
